# Supplementary material for: La prudencia como retórica: el arte de la praxis
Source: eLife journal article supplement (doi:10.7554/elife.64320), 2001-01-01

tag removal

tag addition

● Stable point: addition = removal

increase e starting from:  
e=low, tag = low

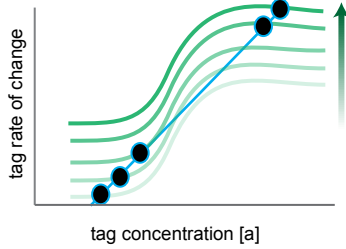

decreasing e starting from:  
e= high, tag = high

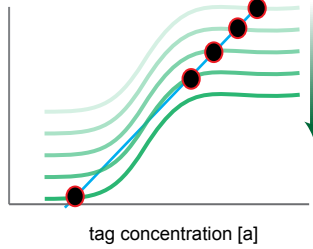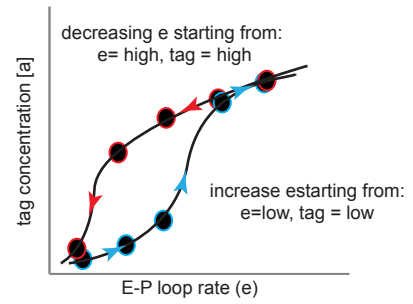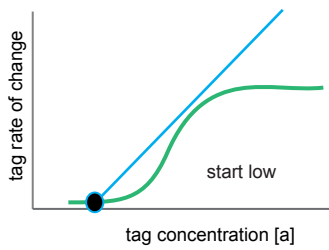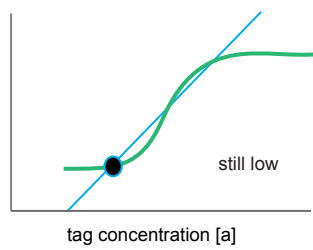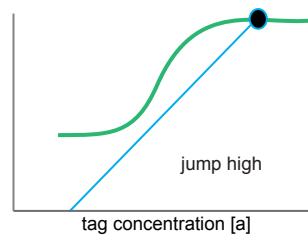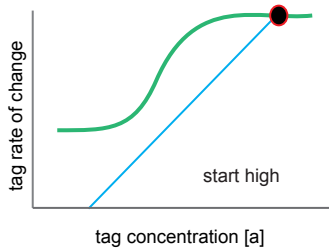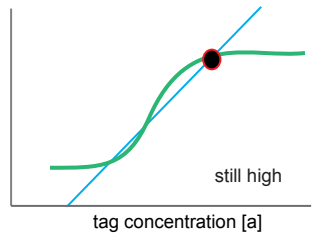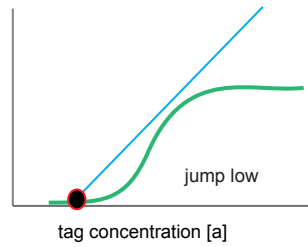

Supplement: supp [file elife-64320-supp-v1.zip]
