# Supplementary material for: La prudencia como retórica: el arte de la praxis
Source: eLife journal article supplement (doi:10.7554/elife.64320), 2001-01-01

A

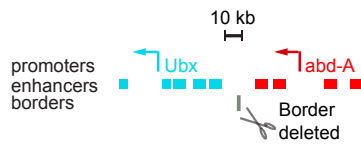

Enhancer Activity

*Ubx enh.* cell type 1 - strong expression  
cell type 2 - weak expression

*abd-A enh.* cell type 1 - weak expression  
cell type 2 - strong expression

B

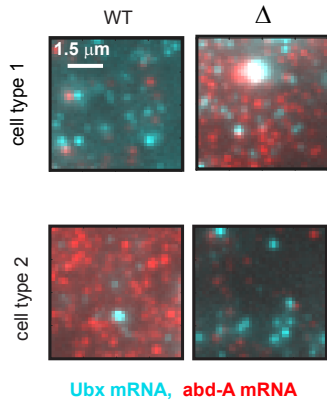

C

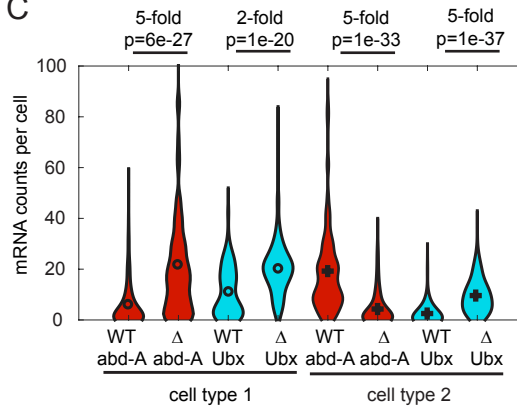

Supplement: supp [file elife-64320-supp-v1.zip]
