# Supplementary figures and images for: La prudencia como retórica: el arte de la praxis
Source: eLife journal article supplement (doi:10.7554/elife.64320), 2001-01-01

A

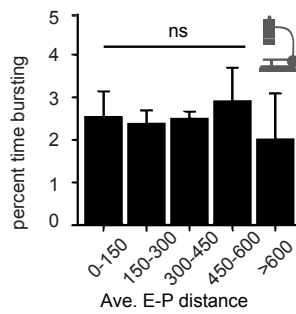

B

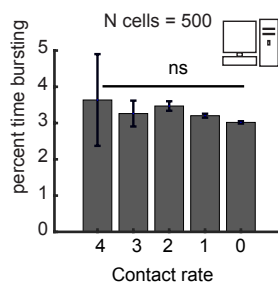

C

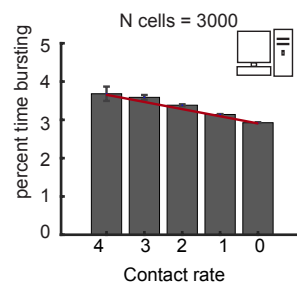

D

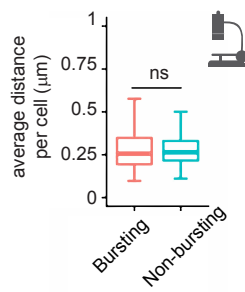

E

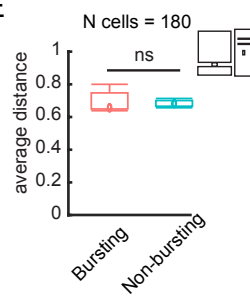

F

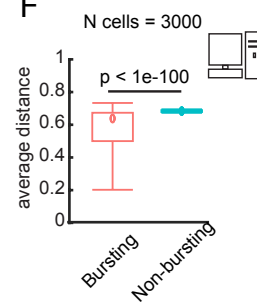

Supplement: supp [file elife-64320-supp-v1.zip]

$$f(x) = V \frac{x^n}{c^n + x^n}$$

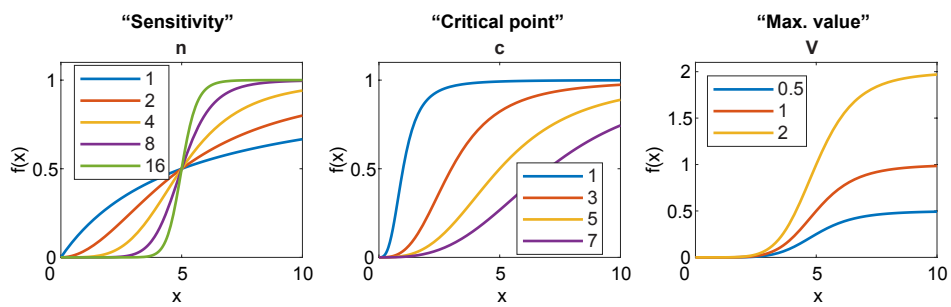

Supplement: supp [file elife-64320-supp-v1.zip]

A

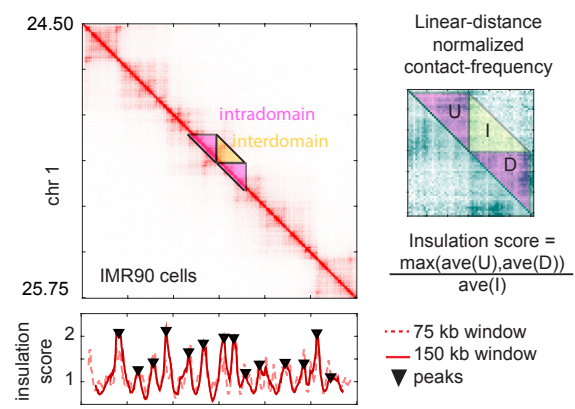

B

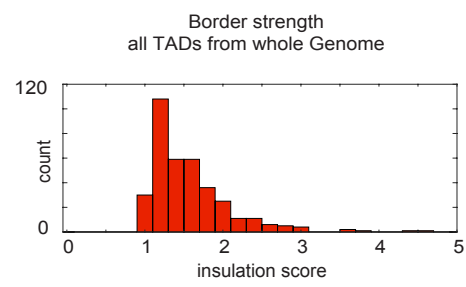

Supplement: supp [file elife-64320-supp-v1.zip]

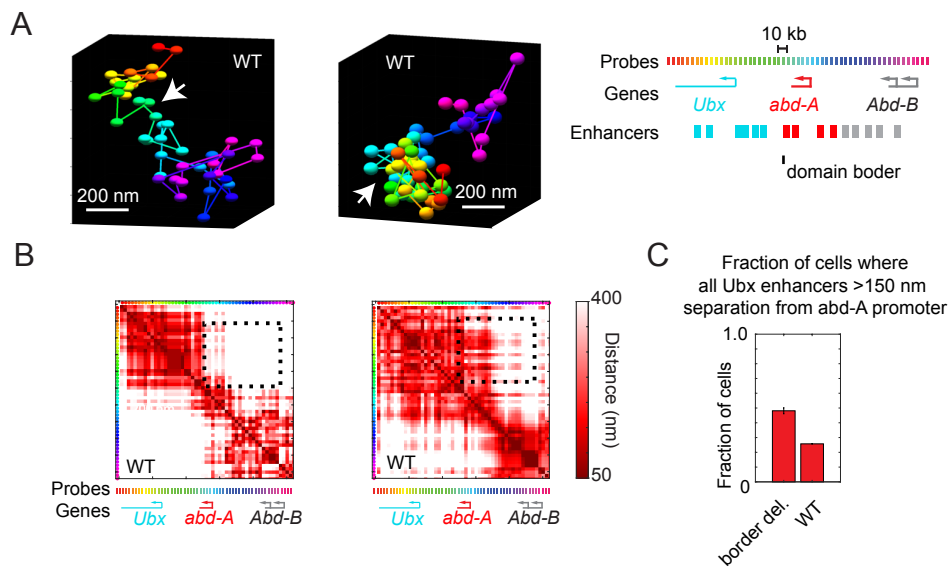

Supplement: supp [file elife-64320-supp-v1.zip]

Reported expression changes upon contact change

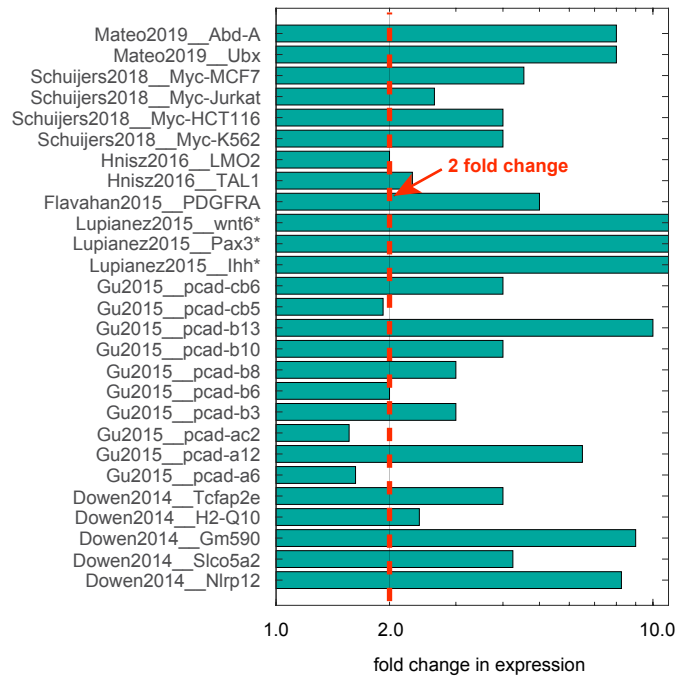

Supplement: supp [file elife-64320-supp-v1.zip]
